# Supplementary material
Source: MDPI journal article supplement (https://www.mdpi.com/2311-5637/7/4/255)
Supplement: s1 [file s1]

## Supporting Material

---

### **Insights into Chufa Milk Frozen Yoghurt as Cheap Functional Frozen Yoghurt with High Nutritional Value**

Seham Swelam <sup>1,\*</sup>, Mohsen A. Zommara <sup>1</sup>, Abd El-Aziz M. Abd El-Aziz <sup>1</sup>, Noha A. Elgammal <sup>1</sup>, Roua S. Baty <sup>2</sup> and Ehab Kotb Elmahallawy <sup>3,\*</sup>

---

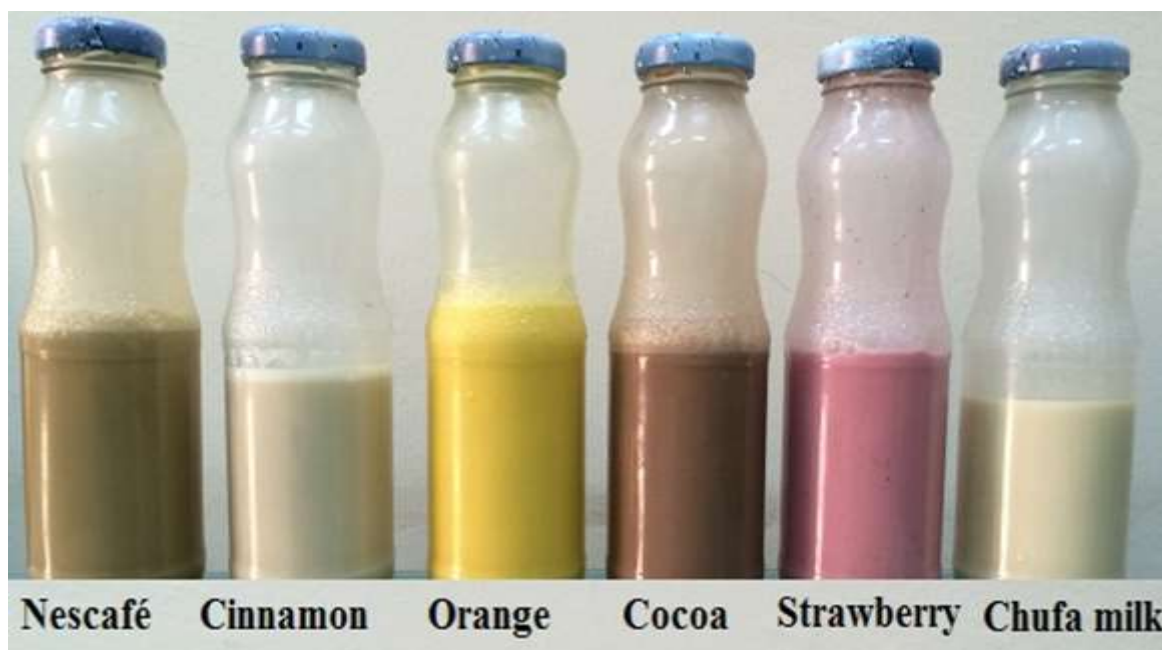

**Figure S1.** The colour & appearance of flavored chufa beverage.
